# 1 **Experimental and methodological framework for the assessment** 2 **of nucleic acids in airborne microorganisms**

3 **Running Title:** Methods in aeromicrobiology

4 Raphaëlle Péguilhan<sup>1\*</sup>, Florent Rossi<sup>1†</sup>, Olivier Rué<sup>2,3</sup>, Muriel Joly<sup>1</sup>, and Pierre Amato<sup>\*1</sup>

5 <sup>1</sup> Université Clermont Auvergne, CNRS, Institut de Chimie de Clermont-Ferrand (ICCF), F-  
6 63000 Clermont-Ferrand, France.

7 <sup>2</sup> Université Paris-Saclay, INRAE, MaIAGE, 78350, Jouy-en-Josas, France.

8 <sup>3</sup> Université Paris-Saclay, INRAE, BioinfOmics, MIGALE bioinformatics facility, 78350,  
9 Jouy-en-Josas, France.

10 \* Now at: Université de Pau et des Pays de l'Adour, E2S UPPA, CNRS, IPREM, Pau, France.

11 † Now at : Département de Biochimie, de Microbiologie et de Bio-informatique, Faculté des  
12 Sciences et de Génie, Université Laval, Quebec City, Quebec, Canada.

13 **Author contributions:** RP, MJ have made major contribution to the acquisition, analysis and  
14 interpretation of the data. FR and OR helped with data acquisition and data analysis. PA  
15 conceived and designed the study, and interpreted the data. PA and RP wrote the manuscript.

16 \*Correspondence to: [pierre.amato@uca.fr](mailto:pierre.amato@uca.fr)

17 **Keywords:** Atmosphere, aerobiology, bacteria, sample replication, contaminants

18 **Data Archiving Statement:** Demultiplexed sequencing files were deposited at the European  
19 Nucleotide Archive and have accession numbers ERR9924984 to ERR9924999, and  
20 ERR9924950 to ERR9924958 (project accession: PRJEB54614).

21 **Acknowledgments:** We thank OPGC' staff for access to puy de Dôme instrumented station.  
22 We are grateful to the platforms AUBI (Clermont Auvergne University's Mésocentre) for  
23 providing computing and storage capacities, and SYSTEM (UCA Partner service) for access  
24 to flow cytometry. This research was supported by the French National Research Agency

25 (ANR) (grant no. ANR-17-MPGA-0013), with fellowship from Clermont Auvergne University  
 26 to RP.

27

28 **Graphical abstract:**

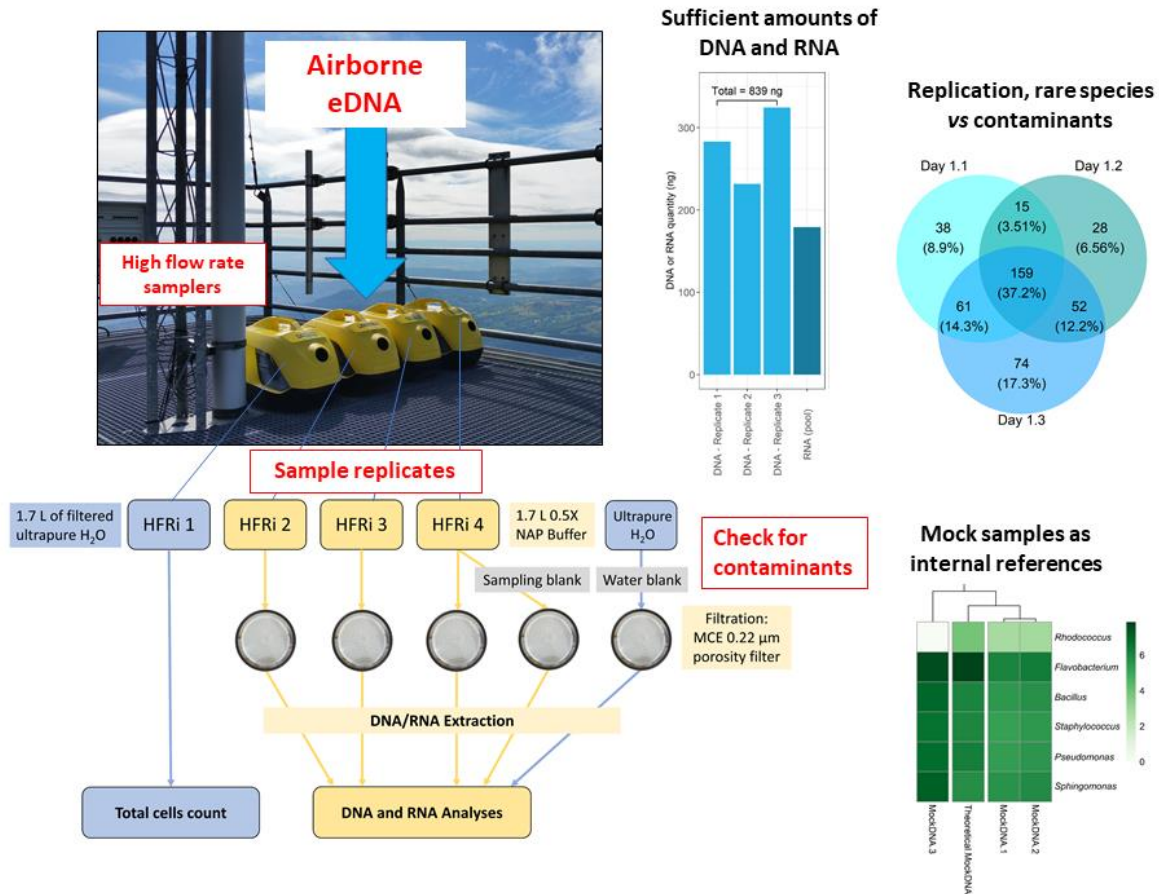

29

30

## 31 **Abstract**

32           Studying airborne microorganisms is highly challenging due to ultra-low and spread  
33 biomass, and great spatial and temporal variabilities at short scales. Aeromicrobiology is still  
34 an emerging discipline of environmental microbiology, and some of the basic practices  
35 (replication, control of contaminants, *etc*) are not yet widely adopted, which potentially limits  
36 conclusions. Here we aim at evaluating the benefits of such practices in the study of the  
37 aeromicrobiome using molecular-based approaches, and recommend the following: (i) sample  
38 at high airflow rate, if possible into a fixative agent, in order to be able to capture specific  
39 situations ; (ii) replicate sampling and process samples individually to enable statistical analyses  
40 ; (iii) check for contaminants at different steps of the analytical process, and account for their  
41 potential stochasticity in sequence decontamination methods ; (iv) include internal references  
42 to verify qualitative and quantitative aspects of the data, and (v) eventually investigate multiple  
43 analytical procedures to identify potential impacts on the data. In our study, samples were  
44 collected at a remote mountain site using high-flow rate impingers collecting airborne material  
45 into nucleic acid preservation buffer. As high of ~75% of the sequences were shared between  
46 independent triplicates, gathering 28 to 38% of the richness observed at the ASV level at a  
47 given sampling date, which also emphasizes spatial heterogeneity at short scale due to rare taxa.  
48 Thanks to replicates, daily variations in the diversity of bacteria could be distinguished  
49 statistically, and the inevitable presence of contaminating sequences in controls could be  
50 accounted for using established statistical methods. This work opens new perspectives and  
51 notably paves the way to untargeted molecular methods in the exploration of aeromicrobiome's  
52 composition and functioning.

53

54

55

## 56 **Introduction**

57           The atmosphere is exposed to emissions of biological material from surface ecosystems  
58 and carries their DNA imprints. These can be lifted up to high altitudes and travel over long  
59 distances up to continental scales (Després et al., 2012; Smith et al., 2013; Barberán et al.,  
60 2015). Biological aerosols play roles as cloud condensation nuclei (CCN) and ice nuclei (IN),  
61 and can have influence on cloud microphysics and precipitation (Zhang et al., 2021; Bauer et  
62 al., 2003; Möhler et al., 2007; Patade et al., 2021). Bioaerosols also include microorganisms of  
63 sanitary concern, such as pathogenic, opportunistic, or antibiotic resistant taxa (Rossi et al.,  
64 2022; Fernstrom et al., 2013; Beattie and Lindow, 1995), and, regardless of the potential  
65 hazards they may create, the fact that microbial cells can maintain metabolic activity (Krumins  
66 et al., 2014; Amato et al., 2019; Šantl-Temkiv et al., 2017) raises questions about their  
67 physiological properties and their role in atmospheric chemical processes (Wirgot et al., 2017;  
68 Khaled et al., 2021; Joly et al., 2015).

69           Aeromicrobiology is still an emerging discipline, and the basics of recommended  
70 practices in environmental microbiology are often neglected. The first prerequisite for a  
71 meaningful analysis is to be able to distinguish target(s) from contaminants. These can originate  
72 from handling, equipment, or reagents including commercial kits (Stinson et al., 2019; de  
73 Goffau et al., 2018; Salter et al., 2014). Preventing contaminants involves, at the very least,  
74 working under adequate sterile conditions, and checking them by taking control samples at  
75 various stages of the analytical process. In addition, statistical comparison between diverse  
76 environmental situations requires replicates (Prosser, 2010; Ji et al., 2019), which also help  
77 detecting sporadic contaminants such as those brought by commercial reagents.

78           The greatest technical challenges in outdoor aeromicrobiology are related to the low  
79 biomass (typically ~1 to 100 cells per liter of air), in particular in remote situations. This  
80 imposes sampling for extended periods of time, or at high-flow rate, and preserving the *in-situ*

81 state of the material during and upon sampling (Burrows et al., 2009; Després et al., 2012; Šantl-  
82 Temkiv et al., 2020). Sampling over long periods of time alters integrity and viability of  
83 airborne biological material and living cells (*e.g.*, Manibusan and Mainelis, 2022). Moreover,  
84 as microbial assemblages vary widely over short temporal and spatial scales, sampling may  
85 have to be carried out over short periods of time (*e.g.*, a few hours or less) depending on the  
86 objectives, for instance for capturing a specific situation. Meanwhile, sufficient quantities of  
87 biological material must be collected to allow analyses, and ensure representativeness of the  
88 samples through statistics. High-flow rate sampling solutions are therefore methods of choice,  
89 and impingers, *i.e.*, liquid impactors, are considered as reference samplers for bioaerosols  
90 (Dybwad et al., 2014; Rule et al., 2007). In addition of preserving cell integrity due to gentler  
91 impaction than on solid surfaces, these allow the use of a variety of solutions for preserving  
92 viability or nucleic acids, including RNAs (Kathiriya et al., 2021; Šantl-Temkiv et al., 2017;  
93 Griffin et al., 2011; Camacho-Sanchez et al., 2013).

94         As analytical methods improve, deepest investigations are made possible, and methods  
95 based on high-throughput sequencing of amplicons are now widely used to explore bacterial  
96 and fungal diversity (Zhao et al., 2022; Tignat-Perrier et al., 2020b). With the advent of NGS  
97 techniques as highly sensitive methods for investigating microbial diversity, new challenges  
98 have emerged such as detection of trace contaminants, sequencing bias and artifacts (de Goffau  
99 et al., 2018). Here, we propose an experimental procedure to study biological aerosols through  
100 nucleic acid-based approaches in remote atmosphere, considering replication and accounting  
101 for inevitable contaminants, whatever their origin. Several high-flow-rate impingers (HFRI)  
102 filled with nucleic acid preservation (NAP) buffer as the sampling fluid were deployed in  
103 parallel for molecular investigations. Controls for the presence of contaminants were made at  
104 multiple steps of the experimental procedure, and quantitative aspects as well as sequence  
105 annotation accuracy were verified using artificial “mock” communities as internal references.

106 Amplicon sequencing data indicated good reproducibility of the methods and allowed  
107 distinguishing bacteria diversity from consecutive days with good statistical confidence. The  
108 amounts of DNA and RNA collected opens unprecedented possibilities of direct sequencing of  
109 metagenomes and metatranscriptomes from atmospheric samples.

110

## 111 **Materials and methods**

112 Drastic procedures were applied throughout the experimental process, including  
113 systematic decontamination of the material used (pipets, *etc.*) with detergents (RNAse away,  
114 ethanol 70% or diluted bleach), exposure to UVs, use of laminar flow hoods, systematic  
115 filtration of all the liquids before autoclave, *etc.*

116

### 117 **Sampling setup with High-Flow-Rate Impingers (HFRI)**

118 Sampling of aerosols was carried out at the summit of puy de Dôme mountain (1,465 m  
119 a.s.l, France) using the facilities of the atmospheric station (Baray et al., 2020; Péguilhan et al.,  
120 2021), during three consecutive days in July 2020. Samples were collected for 6 to 6.5  
121 consecutive hours, corresponding to 708-770 m<sup>3</sup> of air collected by each sampler at each  
122 occasion, at ambient temperature ranging from 11 to 20°C and 48 to 61% humidity (**Table 1**).  
123 More details on the meteorological context, including backward trajectories of the  
124 corresponding air masses can be found at <https://www.opgc.fr/data-center/public/metadata>.

125

126 **Table 1:** Main characteristics of aerosol samples.

| Sample identifier | Sampling date (dd/mm/yyyy) | Number of replicates | Sampling duration (h) | Air temperature (°C) <sup>#</sup> | Relative humidity (%) <sup>#</sup> | Wind speed (m.s <sup>-1</sup> ) <sup>#</sup> | Microbial cell concentration (cell.m <sup>-3</sup> ) <sup>*</sup> |
|-------------------|----------------------------|----------------------|-----------------------|-----------------------------------|------------------------------------|----------------------------------------------|-------------------------------------------------------------------|
| Day 1             | 07/07/2020                 | 3                    | 6.5                   | 11.1                              | 61                                 | 3.6                                          | 1.62×10 <sup>3</sup>                                              |
| Day 2             | 08/07/2020                 | 3                    | 6.1                   | 14.2                              | 53                                 | 3.1                                          | 1.72×10 <sup>3</sup>                                              |
| Day 3             | 09/07/2020                 | 3                    | 6.0                   | 20.3                              | 48                                 | 3.4                                          | 2.62×10 <sup>3</sup>                                              |

127 <sup>#</sup> Average over the sampling period; <sup>\*</sup>: inferred from concentration in the collection liquid and sampler's air flow  
128 rate.

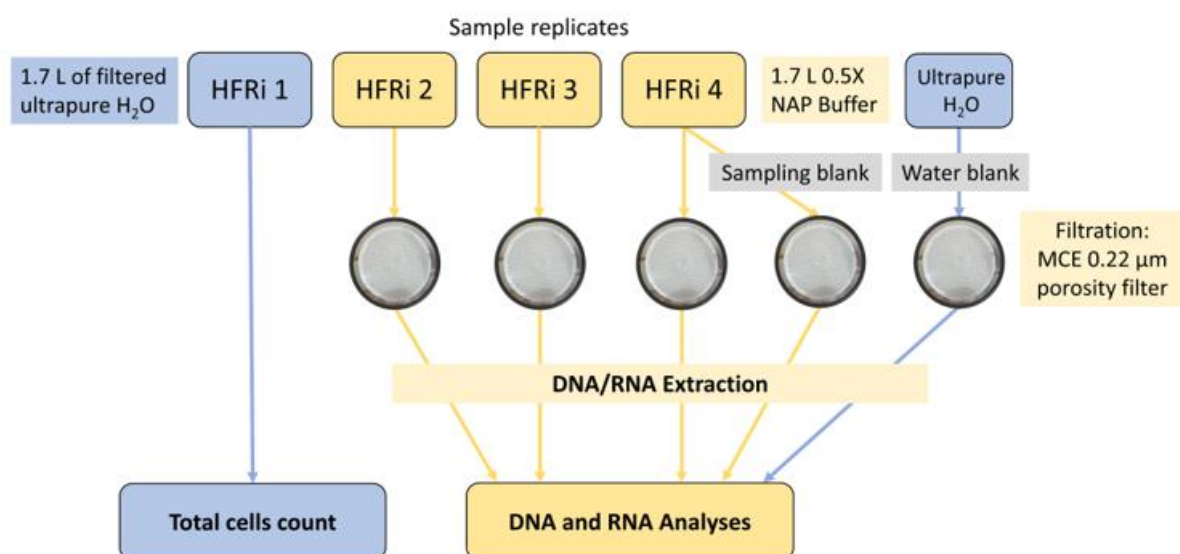

129

130 **Figure 1:** Schematic of the experimental procedure (HFRi: High Flow Rate impinger).

131 The overall sampling strategy is summarized in **Figure 1**. Four HFRi were used in  
132 parallel from the platform of the roof of the atmospheric station. HFRi sampler is a commercial  
133 Kärcher DS 5600 or DS6 vacuum cleaner (Kärcher SAS, Bonneuil sur Marne, France) that can  
134 contain up to 1.7 L of collection liquid and operates at an airflow rate of  $118 \text{ m}^3 \cdot \text{h}^{-1}$  (Šantl-  
135 Temkiv et al., 2017). One of the samplers was dedicated to cell quantification by flow cytometry  
136 and was filled with filtered ( $0.22 \mu\text{m}$  mixed cellulose esters (MCE) membranes, 47 mm  
137 diameter, Dominique Dutscher; Bernolsheim, France) and autoclaved ultrapure water as the  
138 collection liquid. The other three HFRi were dedicated to nucleic acid analyses and were filled  
139 with 0.5X nucleic acid preservation (NAP) buffer (see below for preparation). For all samplers,  
140 the volume of liquid was checked individually every hour by weighing, and it was compensated  
141 for evaporation with filtered autoclaved ultrapure H<sub>2</sub>O when necessary, assuming unit density.  
142 Immediately after sampling (on site), the collection liquid of each individual sampler dedicated  
143 to nucleic acid analyses was filtered independently through  $0.22 \mu\text{m}$  MCE membranes using  
144 sterile filtration units (Thermo Scientific Nalgene), in a laminar flow hood previously exposed  
145 to UV light for 15 min. The filters were then individually placed into 5 mL Type A Bead-Tubes

146 (ref. 740799.50, Macherey-Nagel), added with 1,200  $\mu$ L MWA1 lysis buffer and stored at -  
147 80°C until nucleic acids extraction as specified in the corresponding section below.

148 Negative controls of the collection liquids and samplers were performed just before  
149 sampling: 1.7 L of 0.5 X NAP buffer were poured into one of the HFRi tanks, left for 10 min  
150 with agitation, and then collected in a sterile bottle; these are referred to as “sampling blanks”.  
151 In addition, filtered autoclaved ultrapure water was used as a negative control to detect possible  
152 contamination during sample processing after collection; these are referred to as “water blanks”  
153 (**Figure 1**). All controls were processed and analyzed along with environmental samples.

154 NAP buffer was prepared following the instructions in Camacho-Sanchez et al. (2013).  
155 This is composed of (final concentrations): 0.019 M of ethylenediaminetetra-acetic acid  
156 (EDTA; Fisher BioReagents™), 0.018 M of trisodium citrate salt (Fisher Chemical) and 3.8 M  
157 of ammonium sulfate (ACROS ORGANICS) dissolved in ultrapure water, and H<sub>2</sub>SO<sub>4</sub> to pH  
158 5.2. The NAP buffer was then filtered through Glass Microfiber filters GF/F (47 mm diameter,  
159 porosity of 0.7  $\mu$ m; Whatman; Maidstone, United Kingdom) to remove impurities, aliquoted  
160 and autoclaved as volumes of 1.7 L into 2-L glass bottles for subsequent direct use.

161

## 162 **Sampler decontamination procedure**

163 Ethanol and UVs are common decontamination procedures (Dommergue et al., 2019;  
164 Archer et al., 2019; Šantl-Temkiv et al., 2017). Here the standard decontamination procedure  
165 of the polypropylene HFRi’s tanks consisted in: (1) thorough rinse with H<sub>2</sub>O then deionized  
166 H<sub>2</sub>O; (2) rinse and exposure to 2 L of 70% ethanol for 10 min; (3) exposure of the different  
167 parts of the tanks to UVs (254 nm) for 10 min, within a laminar flow hood. The decontaminated  
168 tanks were then stored in sterile autoclave bags until deployment to the field.

169 To evaluate the efficiency of our decontamination procedure, two sampling tanks were  
170 intentionally contaminated with a culture of *Pseudomonas syringae* 32b-74 (see



171 **Supplementary Figure 1).** The strain was cultured in liquid R2A at 17°C for 3 days and then  
172 centrifuged for 3 min at 13,000 g to recover cells. The supernatant was removed and the pellet  
173 rinsed and resuspended in dH<sub>2</sub>O, at a concentration of  $\sim 2.3 \times 10^9$  cell mL<sup>-1</sup> estimated from OD<sub>600</sub>.  
174 Finally, 7.2 mL of the stock solution was diluted in 1.7 L of autoclaved ultrapure water to reach  
175 a final solution at  $\sim 10^7$  cell mL<sup>-1</sup>, and poured into sampler's tank. Such cell concentration in the  
176 collection liquid is much higher than what can be expected from sampling in natural context  
177 (Šantl-Temkiv et al., 2017); a third sampler was left uncontaminated as a control. The samplers  
178 were then emptied and subjected to decontamination, using either the standard procedure  
179 described above, or just the thorough rinsing step with dH<sub>2</sub>O, then refilled with 1.7 L of filtered  
180 (0.22 μm porosity) autoclaved ultrapure water, as for actual sampling. Samplers were then  
181 switched on for 10 minutes to ensure contact with all tank's parts, and subsamples of the  
182 collection liquid were then analyzed for total cells count as detailed below in the corresponding  
183 section. The autoclaved ultrapure water used was also analyzed without contact with the  
184 samplers. Total cell concentrations in the liquid exposed to the samplers after intentional  
185 contamination and decontamination were similar as those in uncontaminated controls (Mann-  
186 Whitney test; *p-value* < 0.05). A simple thorough rinse with filtered ultrapure water thus  
187 removed cells, and UV exposure ensured further decontamination.

188

### 189 **Total cell counts**

190 Total cells were quantified by flow cytometry from triplicate subsamples of 450 μL of  
191 the collection liquid from the dedicated HFRi, fixed with 50 μL of 5% glutaraldehyde (0.5%  
192 final) and stored at 4°C until analysis, using a BD FACS Calibur instrument (Becton Dickinson,  
193 Franklin Lakes, NJ). Before analysis, samples were added with TE buffer (pH 8.0) and SYBR  
194 Green I stain following the protocols in Amato et al. (2017). Negative controls consisted of  
195 ultrapure water as the template.

196

## 197 **Nucleic acid extraction**

198 Environmental samples were processed within a laminar flow hood previously exposed  
199 to UVs (15 min), and all bench surfaces, pipets etc. were decontaminated using RNase away  
200 spray solution (Thermo Scientific; Waltham, USA). Three nucleic acid extraction kits designed  
201 for DNA and RNA extraction were compared: DNeasy PowerWater kit (QIAGEN; Hilden,  
202 Germany), NucleoSpin Soil, and NucleoMag<sup>®</sup> DNA/RNA Water kit for water and air sample  
203 (Macherey-Nagel, Hoerdtt, France), referred to as the “Water”, “Soil” and “Air” kits,  
204 respectively. The “Water” and “Soil” kits, and the “Soil” and “Air” kits were compared as pairs  
205 during two sampling events each, in triplicate using three independent samplers. After each  
206 sampling event, the collection liquids were entirely and individually filtered through 0.22 µm  
207 MCE membranes. The filters were then cut equally into two pieces for extraction using 2 of the  
208 kits and stored at -80°C until processing. Extractions were performed following the  
209 manufacturers’ protocols. In the case of the “Air” kit, slight adaptations were made from  
210 manufacturer’s instructions: half MCE filters were placed into individual 5 mL Type A Bead-  
211 Tubes (ref. 740799.50, Macherey-Nagel) and added with 1,200 µL MWA1 lysis buffer. After  
212 the lysis step (5 min of bead-beating using a vortex), ~600 µL of lysate was processed following  
213 the protocol adapted for 47 mm filter membranes. For DNA, the lysates were added with 1:50  
214 volumes of RNase A (12 mg/mL, stock solution), incubated for 20 min at room temperature,  
215 then eluted into 50 µL of RNase-free H<sub>2</sub>O after another incubation for 5 min at 56°C. DNA in  
216 the eluates was finally quantified using Quant-iT™ PicoGreen dsDNA kit (Invitrogen; Thermo  
217 Fisher Scientific, Waltham, MA USA). For RNA, the lysates were added with rDNase and  
218 processed as recommended. Purified RNAs were finally quantified by fluorimetry using  
219 RiboGreen (Invitrogen; Thermo Fisher Scientific, Waltham, MA USA). In terms of quantity of  
220 DNA recovered, the “Air” kit outperformed the “Soil” kit, which itself surpassed the “Water”

221 kit (see **Supplementary Figure 2**). The “Air” kit was therefore selected for further  
222 investigations; it has the additional advantage of allowing parallel extraction of DNA and RNA.  
223

#### 224 **16S ribosomal gene amplification by PCR**

225 Amplification of the V4 region of the 16S rRNA gene of bacteria was performed from  
226 genomic DNA extracts by multiplexed PCR, using the primers 515f (5’-  
227 GTGYCAGCMGCCGCGGTAA-3’) (Parada et al., 2016) and 806r (5’-  
228 GGACTACNVGGGTWTCTAAT-3’) (Apprill et al., 2015). The PCR mix was composed as  
229 follows: each 50 µL reaction volume contained 2 µL of sample, 10 µL of 5X Platinum II PCR  
230 Buffer (Invitrogen; Thermo Fisher Scientific, Waltham, MA USA), 5 µL of Platinum GC  
231 Enhancer, 1 µL of 10 nM dNTPs (Sigma-Aldrich; Merck, Darmstadt Germany), 1 µl of 10 µM  
232 forward and reverse primers, 0.2 µL of Platinum II Taq HS DNA pol (Invitrogen), and 29.8 µL  
233 of Ambion™ Nuclease-free water (Invitrogen). PCR amplification conditions (35 PCR cycles)  
234 are described on the “Earth Microbiome Project” website (<https://earthmicrobiome.org/>). All  
235 amplicons (environmental samples and negative and positive controls) were purified using  
236 QIAquick PCR Purification kit (QIAGEN; Hilden, Germany), pooled equimolarly and  
237 sequenced on Illumina Miseq 2\*250 bp (GenoScreen; Lille, France).

238

#### 239 **Quality controls for taxonomic affiliation and biodiversity profiling**

240 Artificial mock samples prepared from pure cultures or DNA extracts were processed  
241 as internal references, down to sequencing. An artificial atmospheric “mock” community was  
242 obtained by mixing pure cultures of six bacterial strains isolated from cloud water and  
243 representing a range of typical atmospheric bacteria (Amato et al., 2007; Väitilingom et al.,  
244 2012; Lallement et al., 2017): *Pseudomonas syringae* PDD-32b-74 (GenBank ID for 16S rRNA  
245 gene sequence: HQ256872), *Bacillus* sp. PDD-5b-1 (DQ512749), *Sphingomonas aerolata*

246 PDD-32b-11 (HQ256831), *Rhodococcus enclensis* PDD-23b-28 (DOVD00000000),  
247 *Staphylococcus equorum* PDD-5b-16 (DQ512761) and *Flavobacterium* sp. PDD-57b-18  
248 (KR922118.1). These were cultured separately in 10 mL of liquid R2A at 17°C until late  
249 exponential phase (21-44h incubation). Genomic DNA were extracted either from pure cell  
250 suspensions then mixed at known concentrations (“Mock DNA”), or from cell suspensions  
251 mixed at known concentrations before DNA extraction (“Mock Cloud”) (**Supplementary**  
252 **Figure 3; Supplementary Table 1**). The former allowed evaluating differences in DNA  
253 amplification efficiency depending on taxa, while the latter evaluated in particular the  
254 efficiency of DNA extraction.

255 For the “Mock DNA” samples, DNA extraction was performed following  
256 manufacturer’s protocol of the QIAamp DNA Mini kit (QIAGEN, Hilden, Germany) with  
257 minor changes: 1 mL of each culture was centrifuged at 14,000 g after 4 days of incubation and  
258 the pellets were re-suspended in 180 µL of TE (1X), with 25 µL of lysozyme (50 mg/mL) and  
259 5 µL of RNase (1 mg/mL). The mixture was vortexed and incubated 30 min at 37°C. Twenty  
260 microliters of Protease K and 200 µL of Buffer AL were added. The mixture was vortexed  
261 again and incubated first during 30 min at 56°C, then for 5 min at 95°C. DNA was finally  
262 quantified in each individual extract using Quant-iT™ PicoGreen® dsDNA kit (Invitrogen;  
263 Thermo Fisher Scientific, Waltham, MA USA) and “Mock DNA” aliquots were prepared by  
264 mixing 2 µL of each extract, then stored at -80°C.

265 For the “Mock cloud” samples, the cell concentrations in individual cultures were  
266 estimated by flow cytometry. The six strains were then mixed at known concentrations  
267 (**Supplementary Table 1**) and 1 mL aliquots in 10% glycerol were stored at -80°C for further  
268 use. DNA was extracted in triplicate for mixed cell suspensions using either NucleoMag®  
269 DNA/RNA Water (Macherey-Nagel, Hoerd, France), *i.e.*, the kit denominated as “Air” in the  
270 previous section, or QIAamp DNA Mini kit (QIAGEN; Hilden, Germany) (**Supplementary**

271 **Figure 3**). DNA extracts were stored at  $-80^{\circ}\text{C}$  before further processing. The relative  
272 abundances of 16S rRNA gene sequences in the extracts were estimated from total genomic  
273 DNA quantifications and from the mean numbers of ribosomes in the corresponding genera, as  
274 reported in the ribosomal RNA Database (rrnDB, v 5.7): 4.3 copies for *Rhodococcus*, 6.6 for  
275 *Flavobacterium*, 8.7 for *Bacillus*, 5.7 for *Staphylococcus*, 4.8 for *Pseudomonas*, and 2.0 for  
276 *Sphingomonas*.

277

### 278 **Bioinformatics data processing and statistics**

279 Amplicon sequence variants (ASVs) were obtained from raw reads with the package  
280 *dada2* (v 1.20.0) (Callahan et al., 2016), using the functions *filterAndTrim*, *learnErrors*, *dada*,  
281 *mergePairs*, *makeSequenceTable* and *removeBimeraDenovo* following authors guidelines.  
282 Then, FROGS software (Bernard et al., 2021) was used to affiliate ASVs against SILVA v138.1  
283 (Quast et al., 2013). When the BLAST assignment was questionable (*i.e.*, multi-affiliations,  
284 percent identity  $< 95\%$ , or percent query coverage  $< 98\%$ ), this was verified using the RDP  
285 assignment and the EzBioCloud 16S rRNA gene-based ID database (Yoon et al., 2017;  
286 <https://www.ezbiocloud.net/>, update 2021.07.07). ASVs affiliated to *Chloroplast* (46 ASVs;  
287 13% of total sequences), *Mitochondria* (71; 1.6 %) or Archaea (5; 0.2%), and ASVs without  
288 affiliation (87; 4%) were removed. The number of raw reads processed and remaining for  
289 analysis after curation and rarefaction are indicated in **Supplementary Table 2**. Environmental  
290 and mock samples were rarefied to 16,250 and 28,100 sequences, respectively, corresponding  
291 to the sample of each category with the lowest number of reads, using *FROGS Abundance*  
292 *normalization*. Blank samples were not rarefied. This left 22 and 556 ASVs in mock and  
293 environmental samples for further analyses, respectively.

294 ASV abundance data were centered log-ratio (CLR)-transformed, as recommended by  
295 Gloor et al. (2017) to account for their compositional nature. Data analysis was performed and

296 represented using the *R* environment (v 4.0.3) (R Core Team (2019). *R: A language and*  
297 *environment for statistical computing.*, 2020). The *zCompositions* package (v 1.3.4) (Palarea-  
298 Albaladejo and Martín-Fernández, 2015) was used to replace null counts in our compositional  
299 data based on a Bayesian-multiplicative method (function *cmultRepl* using CZM method and  
300 an input format in pseudo-counts) and to CLR-transform the abundance table (*clr* function).  
301 Heatmaps and dendograms were obtained using the packages *pheatmap* (v 1.0.12) (Raivo  
302 Kolde, 2019) and *ggdendro* (v 0.1.22) (Andrie de Vries and Brian D. Ripley, 2016). Principal  
303 component analysis was carried out using the *R* package *factoExtra*, with ellipses depicting  
304 95% confidence levels. The *R* package *decontam* (Davis et al., 2018) was used for identifying  
305 and removing contaminants (referred to as “Method (iv)” in the corresponding result section).  
306 Univariate statistical tests were performed using PAST v. 4.02 (Hammer et al., 2001).

307

308

## 309 **Results and discussion**

310 Total cells in the air samples averaged  $(1.98 \pm 0.55) \times 10^3$  cell m<sup>-3</sup> of air (**Table 1**); these  
311 are typical values at puy de Dôme station (Vaïtilingom et al., 2012). In total, 424 ASVs could  
312 be detected on Day 1, 378 on Day 2, and 348 on Day 3. The main bacterial phyla identified  
313 belonged to Proteobacteria (Alpha- and Gamma-; e.g., *Sphingomonas*, *Methylobacterium*,  
314 *Massilia*, *Pseudomonas* and *Bradyrhizobium*), Firmicutes (e.g., *Bacillus*), Actinobacteria (e.g.,  
315 *Nocardioides*), and Bacteroidota (e.g., *Hymenobacter* and *Pedobacter*), which are commonly  
316 reported in the atmosphere (Bowers et al., 2012; Tignat-perrier et al., 2019). Day 1 was  
317 characterized by high abundance of *Sphingomonas* (3.2 % of the sequences), over  
318 *Hymenobacter* (1.1 %) and *Pseudomonas* (1.0 %), while Day 3 was more evenly dominated by  
319 *Sphingomonas* (1.8%), *Bacillus* (1.6 %) and *Methylobacterium* (1.2 %) (see **Supplementary**  
320 **Figure 4, and Supplementary Table 3**).

321

### 322 **The recovery of high amounts of DNA and RNA opens new perspectives**

323 The amounts of DNA extracted from the collection liquids ranged from 70.5 ng (Day 3,  
324 replicate 2), to 324.5 ng (Day 1, replicate 3), with low variations between replicates (CV<30%).  
325 In total, 309 to 839 ng of DNA and 118.8 ng to 179.1 ng of RNA were available for analyses  
326 (**Figure 2**). These quantities are sufficient to allow direct sequencing of DNA and cDNA using  
327 current high throughput methods, which opens unprecedented opportunities of metagenomics  
328 and metatranscriptomics studies.

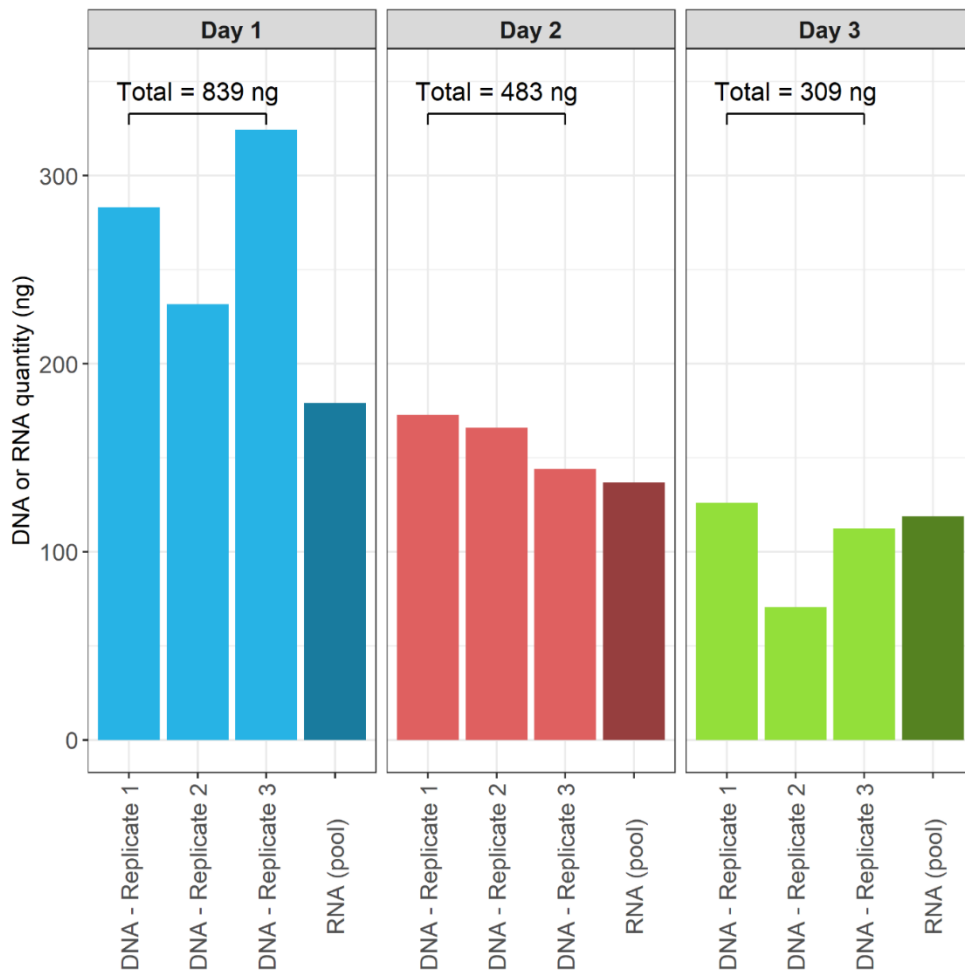

329

330

331 **Figure 2:** DNA and RNA concentrations in environmental air samples.

332

333 Metagenomics and metatranscriptomics approaches have proven their strength in the  
334 understanding of microbial functioning in environments like oceans (Salazar et al., 2019;  
335 Gifford et al., 2011). In the air, nucleic acids are in general obtained from filter samples (Be et  
336 al., 2015; Tignat-Perrier et al., 2020a; Gusareva et al., 2019), which prevents relevant  
337 assessment of transcriptomes. To our knowledge the very few studies reporting  
338 metatranscriptomes sequences from atmospheric samples so far involved targeted or untargeted  
339 pre-amplification (PCR or MDA) (Amato et al., 2019; Womack et al., 2015; Klein et al., 2016;  
340 Amato et al., 2017).

341



342 **Internal references allow evaluating quantitative aspects**

343 Mixed cell suspensions (“Mock cloud”) and DNA mixes (“Mock DNA”), composed of  
344 cultures and DNA extracts of isolates from clouds, were processed as internal references. These  
345 included a range of bacteria typically reported in atmospheric samples: affiliated with  
346 *Pseudomonas syringae*, *Bacillus* sp., *Sphingomonas aerolata*, *Rhodococcus enclensis*,  
347 *Staphylococcus equorum* and *Flavobacterium* sp.. In all cases, clustering analysis followed  
348 expectations and grouped replicates with their respective theoretical taxa distribution  
349 (**Supplementary Figure 5**). Mock DNA samples data supported that PCR and sequencing  
350 processes were efficient at maintaining the relative distribution of taxa from DNA mixes. In  
351 Mock cloud samples, *Staphylococcus* was found overrepresented at the expense of *Bacillus* as  
352 compared to expectations based on cell counts, in particular when using QIAamp extraction kit.  
353 The primer pair used for 16S rRNA gene amplification (515F-806R) has been shown to perform  
354 better than many other current ribosomal primers in detecting a wide range of bacteria taxa  
355 (Abellan-Schneyder et al., 2021) and could not be incriminated. It is likely, rather, that cell  
356 counts by flow cytometry tended to underestimate the actual relative abundance of  
357 *Staphylococcus* in the original cell suspensions as this forms cell agglomerates, while *Bacillus*  
358 was to some extent recalcitrant to DNA extraction due to the presence of spores (Knüpfer et al.,  
359 2020). This indicates that specific taxa, in particular among Firmicutes, can present distortions  
360 in their relative abundance in sequence datasets compared with actual abundance in samples.

361 The few other sequences sporadically present in positive controls at very low abundance  
362 (<50 reads; <0.05% of the total reads in samples; **Supplementary Table 4**) may inform about  
363 the presence of contaminants and/or sequencing artifacts. Moreover, aliquots of both mock  
364 sample types were archived at -80°C for further use as references to compare data from distinct  
365 sequencing runs and studies.

366

367 **Replicate sampling allows statistics**

368 The data demonstrate good reproducibility of the methods (**Figure 3**); it allowed  
369 distinguishing the airborne bacteria diversity of 3 consecutive days with very similar  
370 environmental conditions by principal component analysis (PCA) (**Figure 3A**).

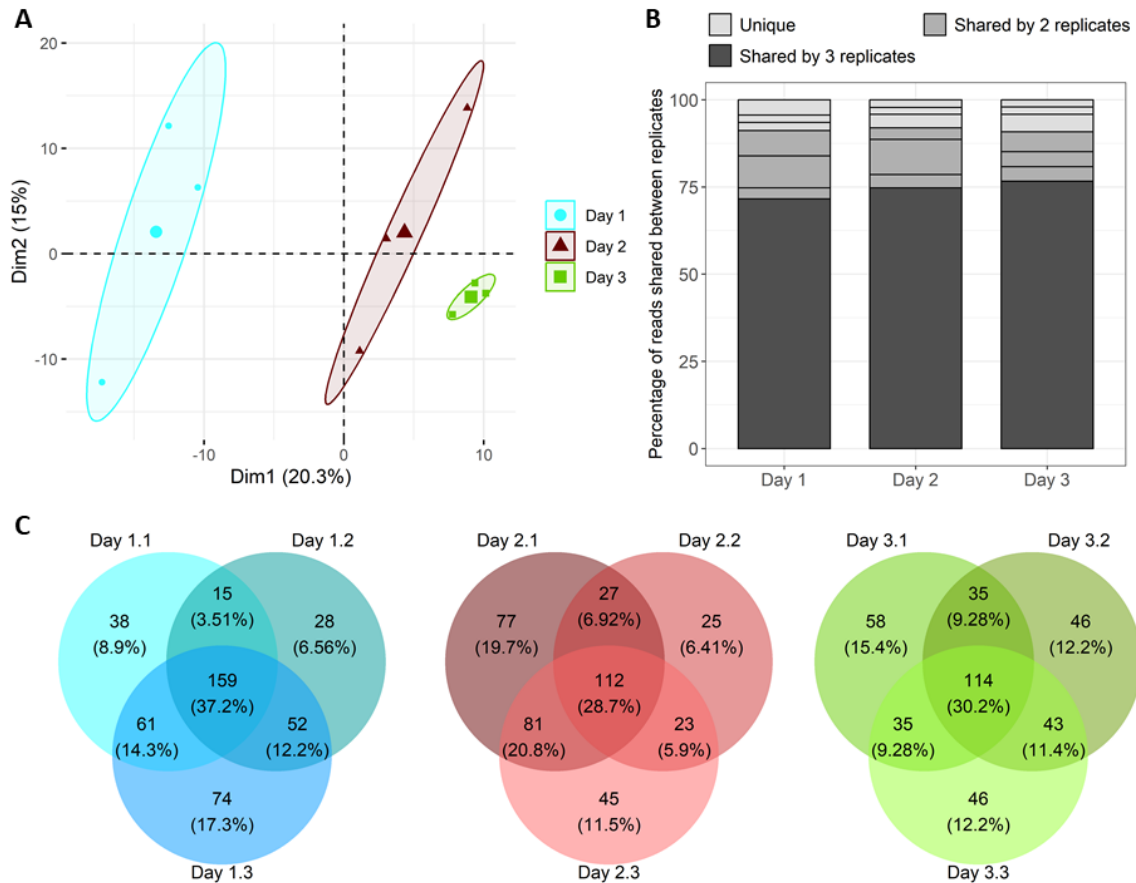

371  
372 **Figure 3:** Distribution of ASVs and sequences among sample replicates. **A:** Principal  
373 component analysis based on ASV's relative abundances (ellipses depict 95% confidence level  
374 areas); **B:** Proportions of sequencing reads retrieved in 1 (unique), 2 or 3 sample replicates; **C:**  
375 Venn diagrams showing the occurrence (presence/absence) of ASVs among sample replicates.

376

377 Bacterial assemblages were very uneven, composed of few abundant taxa accompanied  
378 by numerous sporadic (low-abundance) ones. Most sequences were consistently retrieved  
379 between sample replicates (71.6% to 76.8% depending on the sampling date; **Figure 3B**),  
380 representing a core assemblage gathering 28.7% to 37.2% of the richness (**Figure 3C**). In turn,

381 only ~3% of the sequences were specific, *i.e.* retrieved in only one of the 3 replicates of each  
382 sampling date, but they contributed relatively large proportions (6.4% to 19.7%) of the observed  
383 species richness in a sampler. Low-abundance taxa thus largely contributed to the variability  
384 observed between replicates and sampling dates, which is common in such datasets as pointed  
385 earlier in a range of ecosystems from air and lakes to skin and gut (Shade et al., 2014). With  
386 our setup, taxa's rarity directly related to their chance to be captured by one or more samplers.  
387 The fact that a relatively large fraction of the total richness observed on a given sampling date  
388 was specific (~33 to 40%) emphasizes the high spatial heterogeneity at short scale of the  
389 atmospheric environment, as regularly documented (Fierer et al., 2008), which is caused by a  
390 high proportion of rare taxa. The multiplicity of potential sources to the material collected and  
391 their respective strengths in emitting microorganisms can generate such variations despite  
392 overall very similar environmental conditions. Rare taxa can be important components of the  
393 material circulating in the air, for ecological and/or sanitary reasons, and they must not be  
394 neglected (Jalasvuori, 2020; Barberán et al., 2014; Leyronas et al., 2018; Pascoal et al., 2021;  
395 Pester et al., 2010; Rossi et al., 2022; Lynch and Neufeld, 2015).

396 Thanks to the individual processing of replicate samples, we could statistically  
397 discriminate sampling dates. Nevertheless, given the large number of potential explanatory  
398 variables involved respect to the limited number of samples assessed, it would be highly  
399 hazardous to try explaining the variability observed between sampling dates, so such attempt is  
400 not proposed. A more complete assessment of the extended dataset in relation to environmental  
401 variables can be found in Péguilhan et al. (2023).

402

### 403 **Account for the inevitable presence of contaminants**

404 Processing negative controls is crucial in environmental microbiology to ensure data  
405 robustness, in particular where the biomass is low and subjected to strong short-scale variations

406 such as in the atmosphere. As many contaminants can be brought by air itself (other than from  
407 the target environment) during sample handling and processing, detecting them is particularly  
408 challenging in aeromicrobiology (Šantl-Temkiv et al., 2022). Moreover, rare taxa can easily be  
409 confounded with stochastic trace contaminants from kits and reagents, or sequencing artefacts  
410 (de Goffau et al., 2018; Šantl-Temkiv et al., 2020; Glassing et al., 2016; Salter et al., 2014).

411 The amounts of nucleic acids recovered from controls, *i.e.* 1.7 L of unexposed deionized  
412 water (“water blanks”) or of NAP buffer exposed to the samplers (“sampling blanks”) were  
413 well below the amounts obtained from environmental samples: over 10 sampling blanks  
414 performed between July 2019 and September 2020 (including some which are not presented  
415 here, collected in the frame of other studies), the total amount of DNA ranged from 2.8 to 9.6  
416 ng ( $7.45 \pm 2.1$  ng; mean  $\pm$  SE), while it remained under detection limits for water blanks. From  
417 both control types, slight PCR products could be generated, and these were processed down to  
418 sequencing. This points toward the difficulty to maintain background signals at low level when  
419 using DNA amplification and high-throughput sequencing methods. Stinson et al. (2019)  
420 proposed to treat commercial reagents with DNase in order to remove potential contaminants.

421 The number of raw sequencing reads was much fewer in controls than in environmental  
422 samples as expected from lower amounts of DNA, with medians of ~4,000 *versus* ~88,000  
423 reads, respectively (Mann-Whitney test,  $p = 0.001$ ; **Supplementary Table 2**). Both water and  
424 sampling controls types exhibited much lower richness and diversity than environmental  
425 samples. Among controls, more raw reads could be obtained from unexposed water than from  
426 the collection liquid after exposed to the samplers, and they tended to be richer (Chao1 index).  
427 This confirms the effectiveness of sampler decontamination procedures and suggests that  
428 contamination occurred randomly during sample processing rather than during field work; it  
429 also indicates the absence of core contamination from the reagents and material used.

430 A total of 89 ASVs could be detected in controls, including 18 to 47 ASVs in water  
431 blanks and 24 to 29 ASVs in sampling blanks; 54 of them (~61%) were also detected in  
432 environmental samples. These were affiliated with a large diversity of taxa identified as  
433 frequent contaminants in commercial reagents (Stinson et al., 2019; Salter et al., 2014; Glassing  
434 et al., 2016) and also typically dominant in atmospheric samples (Väitilingom et al., 2012;  
435 Amato et al., 2017), such *Sphingomonas*, *Pseudomonas*, *Hymenobacter*, and *Methylobacterium*  
436 (see **Supplementary Table 5** for complete list).

437 The stochasticity of contaminants (Stinson et al., 2019) makes them difficult to detect  
438 in complex datasets. In our study, most ASVs in controls (56 out of 89; 63%) occurred only  
439 once, and only 3 were recurring, affiliated with *Sphingomonas*, *Pseudomonas*, and  
440 *Burkholderia*: (cluster\_4, cluster\_2 and cluster\_174, respectively). Cluster\_4 was present in all  
441 the samples processed in this study, including positive (“Mock”) controls; cluster\_2 was present  
442 in at least one replicate of each sampling date, in various proportions; cluster\_174 was absent  
443 from environmental samples. This latter was therefore most likely associated with reagents or  
444 sequencing procedures.

445 The most conservative way to account for contaminants in samples is to exclude them  
446 totally from environmental datasets, regardless of their relative abundance (it would be  
447 irrelevant to subtract read numbers or proportions), although this is likely to remove also true  
448 members of the environment studied. Besides, less drastic, more elaborated statistical  
449 procedures have been proposed to account for both the prevalence and frequency of  
450 contaminants in such datasets (Davis et al., 2018), and so better consider stochasticity aspects;  
451 this requires replicates. In order to test the influence of sequence decontamination methods on  
452 richness and diversity, 4 treatments were applied to non-rarefied environmental datasets: (i)  
453 strict removal of all the ASVs detected in water blanks regardless of their relative abundance;  
454 (ii) strict removal of all the ASVs detected in sampling blanks; (iii) strict removal of all the

455 ASVs detected in water and/or in sampling blanks; (iv) probability-based method cumulating  
 456 the frequency and prevalence methods of the R package *decontam* (Davis et al., 2018).

457

458 **Table 2:** Proportions of reads and ASVs removed from environmental datasets from  
 459 decontamination methods (see text for details on the methods).

| Sample  | Initial data (non-rarefied) |                       | Method (i) (water blanks) |                | Method (ii) (sampling blanks) |                | Method (iii) (water + sampling blanks) |                | Method (iv) (probability) |                |
|---------|-----------------------------|-----------------------|---------------------------|----------------|-------------------------------|----------------|----------------------------------------|----------------|---------------------------|----------------|
|         | Number of reads             | Number of ASVs        | % reads removed           | % ASVs removed | % reads removed               | % ASVs removed | % reads removed                        | % ASVs removed | % reads removed           | % ASVs removed |
| Day 1.1 | 18823                       | 273                   | 24.07%                    | 10.26%         | 16.66%                        | 7.69%          | 31.07%                                 | 14.29%         | 2.75%                     | 4.40%          |
| Day 1.2 | 16250                       | 254                   | 23.22%                    | 9.84%          | 16.46%                        | 7.09%          | 31.41%                                 | 14.17%         | 3.24%                     | 4.72%          |
| Day 1.3 | 24856                       | 346                   | 22.55%                    | 8.38%          | 14.97%                        | 6.07%          | 29.03%                                 | 11.85%         | 2.99%                     | 4.62%          |
| Day 2.1 | 27670                       | 297                   | 38.23%                    | 9.43%          | 12.94%                        | 6.40%          | 44.86%                                 | 12.79%         | 2.97%                     | 5.72%          |
| Day 2.2 | 19027                       | 187                   | 45.99%                    | 9.63%          | 12.66%                        | 8.02%          | 53.82%                                 | 15.51%         | 1.56%                     | 4.28%          |
| Day 2.3 | 24406                       | 261                   | 44.14%                    | 8.81%          | 12.27%                        | 5.36%          | 49.63%                                 | 11.49%         | 1.63%                     | 3.45%          |
| Day 3.1 | 29709                       | 242                   | 45.88%                    | 7.02%          | 9.41%                         | 4.96%          | 51.68%                                 | 10.33%         | 1.50%                     | 3.31%          |
| Day 3.2 | 24392                       | 238                   | 48.38%                    | 9.24%          | 11.30%                        | 7.56%          | 55.12%                                 | 13.45%         | 3.23%                     | 6.30%          |
| Day 3.3 | 23014                       | 238                   | 48.94%                    | 9.24%          | 10.72%                        | 7.14%          | 54.94%                                 | 13.03%         | 2.92%                     | 5.04%          |
|         |                             | <b>Mean</b>           | <b>37.93%</b>             | <b>9.10%</b>   | <b>13.04%</b>                 | <b>6.70%</b>   | <b>44.62%</b>                          | <b>12.99%</b>  | <b>2.53%</b>              | <b>4.65%</b>   |
|         |                             | <i>Standard error</i> | <i>11.41%</i>             | <i>0.95%</i>   | <i>2.52%</i>                  | <i>1.07%</i>   | <i>11.05%</i>                          | <i>1.59%</i>   | <i>0.74%</i>              | <i>0.97%</i>   |

460

461

462 The proportions of reads and ASVs removed with each method and their influence on  
 463 richness and biodiversity on environmental data are presented in **Table 2** and **Figure 4**,  
 464 respectively. All methods showed very good consistency between replicates. These all  
 465 necessarily decreased richness in samples, by ~5% to ~13% in average depending on the  
 466 methods (**Table 2**). The strict methods (*i*, *ii* and *iii*) led to the removal of higher proportions of  
 467 reads than ASV, contrarily to the statistic method, and strongly increased biodiversity index in  
 468 samples, by up to more than 1 point in the cases of Day 2 and Day 3 (**Figure 4**). In turn, the  
 469 statistic method (*iv*) did not alter biodiversity indexes.

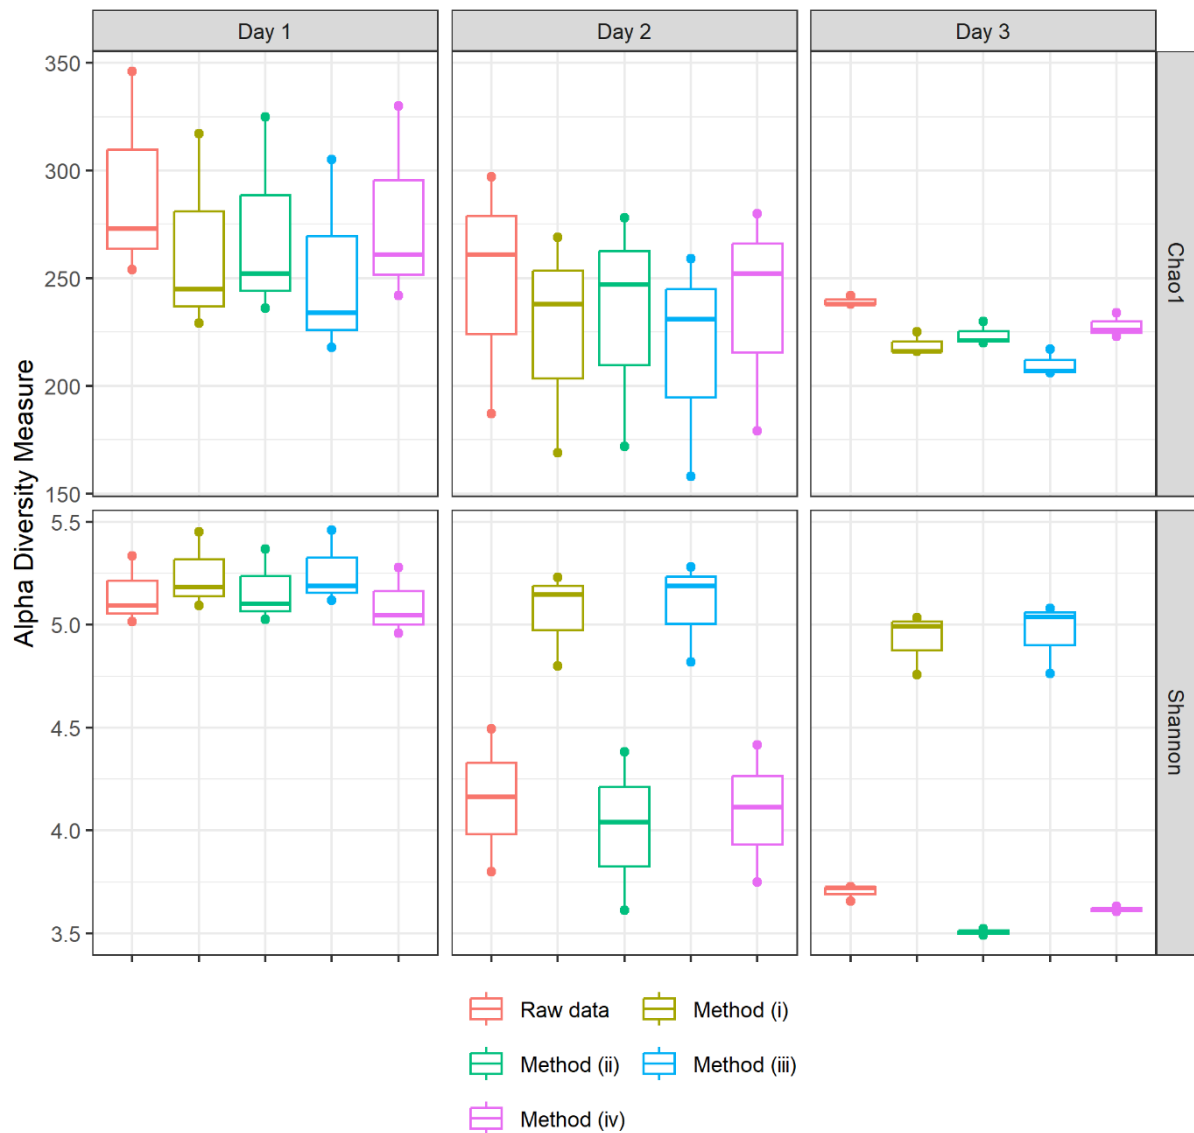

470

471 **Figure 4:** Influence of decontamination methods on environmental samples' richness and  
472 biodiversity indexes.

473

474 The decontamination solutions that can appear the most conservative at first sight can  
475 thus counterintuitively lead to increase biodiversity in environmental samples and smooth  
476 temporal variability, so result in erroneous conclusions. In addition of strengthening statistics  
477 aiming at deciphering alpha- and beta- diversity of airborne microbial assemblages, replication  
478 also enables more meaningful decontamination methods to be applied.

479

## 480 **Conclusion**

481           We used an analytical framework involving some of the basic recommended practices  
482 in environmental microbiology (replicate, check and account for contaminants, include internal  
483 references) to atmospheric samples, and demonstrate that these can logically benefit to  
484 aerobiology as well in many aspects. Replicated sampling at high air-flow rate for short periods  
485 of time into nucleic acid preservation buffer allows capturing close atmospheric situations that  
486 can be distinguished statistically using high throughput sequencing methods. Replication is also  
487 necessary to account for the stochastic and inevitable presence of contaminants, and so to ensure  
488 confidence to taxa's presence and abundance in environmental samples. Finally, replicating  
489 also allows pooling to access larger amounts of material if necessary, which opens new  
490 perspectives for metagenomics and metatranscriptomics investigations of the aeromicrobiome.  
491 Analyses of the alpha- and beta- diversity of microbial assemblages in air masse, and short-  
492 scale and specific atmospheric variations (*i.e.*, day-to-day or day/night variations, clouds,  
493 pollution events, etc) will be assessable with good confidence using this framework.

494



## 495 **References**

- 496 Abellan-Schneyder, I., Machado, M. S., Reitmeier, S., Sommer, A., Sewald, Z., Baumbach,  
497 J., List, M., and Neuhaus, K.: Primer, Pipelines, Parameters: Issues in 16S rRNA Gene  
498 Sequencing, *mSphere*, 6, e01202-20, <https://doi.org/10.1128/mSphere.01202-20>, 2021.
- 499 Amato, P., Parazols, M., Sancelme, M., Laj, P., Mailhot, G., and Delort, A. M.:  
500 Microorganisms isolated from the water phase of tropospheric clouds at the Puy de Dôme:  
501 Major groups and growth abilities at low temperatures, in: *FEMS Microbiology Ecology*,  
502 242–254, <https://doi.org/10.1111/j.1574-6941.2006.00199.x>, 2007.
- 503 Amato, P., Joly, M., Besaury, L., Oudart, A., Taib, N., Moné, A. I., Deguillaume, L., Delort,  
504 A. M., and Debroas, D.: Active microorganisms thrive among extremely diverse communities  
505 in cloud water, *PLoS ONE*, 12, 1–22, <https://doi.org/10.1371/journal.pone.0182869>, 2017.
- 506 Amato, P., Besaury, L., Joly, M., Penaud, B., Deguillaume, L., and Delort, A. M.:  
507 Metatranscriptomic exploration of microbial functioning in clouds, *Scientific Reports*, 9,  
508 <https://doi.org/10.1038/s41598-019-41032-4>, 2019.
- 509 Andrie de Vries and Brian D. Ripley: *ggdendro: Create Dendrograms and Tree Diagrams*  
510 Using “ggplot2”. R package version 0.1-20., 2016.
- 511 Apprill, A., McNally, S., Parsons, R., and Weber, L.: Minor revision to V4 region SSU rRNA  
512 806R gene primer greatly increases detection of SAR11 bacterioplankton, *Aquatic Microbial*  
513 *Ecology*, 75, 129–137, <https://doi.org/10.3354/ame01753>, 2015.
- 514 Archer, S. D. J., Lee, K. C., Caruso, T., Maki, T., Lee, C. K., Cary, S. C., Cowan, D. A.,  
515 Maestre, F. T., and Pointing, S. B.: Airborne microbial transport limitation to isolated  
516 Antarctic soil habitats, *Nature Microbiology*, 4, 925–932, [https://doi.org/10.1038/s41564-019-](https://doi.org/10.1038/s41564-019-0370-4)  
517 [0370-4](https://doi.org/10.1038/s41564-019-0370-4), 2019.
- 518 Baray, J. L., Deguillaume, L., Colomb, A., Sellegri, K., Freney, E., Rose, C., Baelen, J. Van,  
519 Pichon, J. M., Picard, D., Fréville, P., Bouvier, L., Ribeiro, M., Amato, P., Banson, S.,  
520 Bianco, A., Borbon, A., Bourcier, L., Bras, Y., Brigante, M., Cacault, P., Chauvigne, A.,  
521 Charbouillot, T., Chaumerliac, N., Delort, A. M., Delmotte, M., Dupuy, R., Farah, A., Febvre,  
522 G., Flossmann, A., Gourbeyre, C., Hervier, C., Hervo, M., Huret, N., Joly, M., Kazan, V.,  
523 Lopez, M., Mailhot, G., Marinoni, A., Masson, O., Montoux, N., Parazols, M., Peyrin, F.,  
524 Pointin, Y., Ramonet, M., Rocco, M., Sancelme, M., Sauvage, S., Schmidt, M., Tison, E.,  
525 Vaïtilingom, M., Villani, P., Wang, M., Yver-Kwok, C., and Laj, P.: Cézeaux-Aulnat-Opme-  
526 Puy de Dôme: A multi-site for the long-term survey of the tropospheric composition and  
527 climate change, *Atmospheric Measurement Techniques*, 13, 3413–3445,  
528 <https://doi.org/10.5194/amt-13-3413-2020>, 2020.
- 529 Barberán, A., Henley, J., Fierer, N., and Casamayor, E. O.: Structure, inter-annual recurrence,  
530 and global-scale connectivity of airborne microbial communities, *Sci. Total Environ.*, 487,  
531 187–195, <https://doi.org/10.1016/j.scitotenv.2014.04.030>, 2014.
- 532 Barberán, A., Ladau, J., Leff, J. W., Pollard, K. S., Menninger, H. L., Dunn, R. R., and Fierer,  
533 N.: Continental-scale distributions of dust-associated bacteria and fungi, *PNAS*, 112, 5756–  
534 5761, <https://doi.org/10.1073/pnas.1420815112>, 2015.

- 535 Bauer, H., Giebl, H., Hitzemberger, R., Kasper-Giebl, A., Reischl, G., Zibuschka, F., and  
536 Puxbaum, H.: Airborne bacteria as cloud condensation nuclei, *Journal of Geophysical*  
537 *Research: Atmospheres*, 108, 4658, <https://doi.org/10.1029/2003JD003545>, 2003.
- 538 Be, N. A., Thissen, J. B., Fofanov, V. Y., Allen, J. E., Rojas, M., Golovko, G., Fofanov, Y.,  
539 Koshinsky, H., and Jaing, C. J.: Metagenomic analysis of the airborne environment in urban  
540 spaces, *Microb. Ecol.*, 69, 346–355, <https://doi.org/10.1007/s00248-014-0517-z>, 2015.
- 541 Beattie, G. A. and Lindow, S. E.: The secret life of foliar bacterial pathogens on leaves,  
542 *Annual review of phytopathology*, 33, 145–172, 1995.
- 543 Bernard, M., Rué, O., Mariadassou, M., and Pascal, G.: FROGS: a powerful tool to analyse  
544 the diversity of fungi with special management of internal transcribed spacers, *Briefings in*  
545 *Bioinformatics*, 22, <https://doi.org/10.1093/BIB/BBAB318>, 2021.
- 546 Bowers, R. M., McCubbin, I. B., Hallar, A. G., and Fierer, N.: Seasonal variability in airborne  
547 bacterial communities at a high-elevation site, *Atmospheric Environment*, 50, 41–49,  
548 <https://doi.org/10.1016/j.atmosenv.2012.01.005>, 2012.
- 549 Burrows, S. M., Elbert, W., Lawrence, M. G., and Pöschl, U.: Bacteria in the global  
550 atmosphere – Part 1: Review and synthesis of literature data for different ecosystems,  
551 *Atmospheric Chemistry and Physics*, 9, 9263–9280, <https://doi.org/10.5194/acp-9-9263-2009>,  
552 2009.
- 553 Callahan, B. J., McMurdie, P. J., Rosen, M. J., Han, A. W., Johnson, A. J. A., and Holmes, S.  
554 P.: DADA2: High-resolution sample inference from Illumina amplicon data, *Nature Methods*  
555 2016 13:7, 13, 581–583, <https://doi.org/10.1038/nmeth.3869>, 2016.
- 556 Camacho-Sanchez, M., Burraco, P., Gomez-Mestre, I., and Leonard, J. A.: Preservation of  
557 RNA and DNA from mammal samples under field conditions, *Molecular Ecology Resources*,  
558 13, 663–673, <https://doi.org/10.1111/1755-0998.12108>, 2013.
- 559 Camacho-Sanchez, M., Burraco, P., Gomez-Mestre, I., and Leonard, J. A.: Preservation of  
560 RNA and DNA from mammal samples under field conditions, *Molecular Ecology Resources*,  
561 13, 663–673, <https://doi.org/10.1111/1755-0998.12108>, 2013.
- 562 Davis, N. M., Proctor, D. M., Holmes, S. P., Relman, D. A., and Callahan, B. J.: Simple  
563 statistical identification and removal of contaminant sequences in marker-gene and  
564 metagenomics data, *Microbiome*, 6, 226, <https://doi.org/10.1186/s40168-018-0605-2>, 2018.
- 565 Després, V. R., Alex Huffman, J., Burrows, S. M., Hoose, C., Safatov, A. S., Buryak, G.,  
566 Fröhlich-Nowoisky, J., Elbert, W., Andreae, M. O., Pöschl, U., and Jaenicke, R.: Primary  
567 biological aerosol particles in the atmosphere: A review, *Tellus, Series B: Chemical and*  
568 *Physical Meteorology*, 64, <https://doi.org/10.3402/tellusb.v64i0.15598>, 2012.
- 569 Dommergue, A., Amato, P., Tignat-Perrier, R., Magand, O., Thollot, A., Joly, M., Bouvier,  
570 L., Sellegri, K., Vogel, T., Sonke, J. E., Jaffrezo, J. L., Andrade, M., Moreno, I.,  
571 Labuschagne, C., Martin, L., Zhang, Q., and Larose, C.: Methods to investigate the global  
572 atmospheric microbiome, *Frontiers in Microbiology*, 10,  
573 <https://doi.org/10.3389/fmicb.2019.00243>, 2019.

- 574 Dybwad, M., Skogan, G., and Blatny, J. M.: Comparative Testing and Evaluation of Nine  
575 Different Air Samplers: End-to-End Sampling Efficiencies as Specific Performance  
576 Measurements for Bioaerosol Applications, *Aerosol Science and Technology*, 48, 282–295,  
577 <https://doi.org/10.1080/02786826.2013.871501>, 2014.
- 578 Fernstrom, A., Goldblatt, M., Fernstrom, A., and Goldblatt, M.: Aerobiology and Its Role in  
579 the Transmission of Infectious Diseases, *Aerobiology and Its Role in the Transmission of*  
580 *Infectious Diseases*, *Journal of Pathogens*, *Journal of Pathogens*, 2013, 2013, e493960,  
581 <https://doi.org/10.1155/2013/493960>, 2013.
- 582 Fierer, N., Liu, Z., Rodríguez-Hernández, M., Knight, R., Henn, M., and Hernandez, M. T.:  
583 Short-Term Temporal Variability in Airborne Bacterial and Fungal Populations, *Appl Environ*  
584 *Microbiol*, 74, 200–207, <https://doi.org/10.1128/AEM.01467-07>, 2008.
- 585 Gifford, S. M., Sharma, S., Rinta-Kanto, J. M., and Moran, M. A.: Quantitative analysis of a  
586 deeply sequenced marine microbial metatranscriptome, *The ISME Journal*, 5, 461–472,  
587 <https://doi.org/10.1038/ismej.2010.141>, 2011.
- 588 Glassing, A., Dowd, S. E., Galandiuk, S., Davis, B., and Chiodini, R. J.: Inherent bacterial  
589 DNA contamination of extraction and sequencing reagents may affect interpretation of  
590 microbiota in low bacterial biomass samples, *Gut Pathog*, 8, 24,  
591 <https://doi.org/10.1186/s13099-016-0103-7>, 2016.
- 592 de Goffau, M. C., Lager, S., Salter, S. J., Wagner, J., Kronbichler, A., Charnock-Jones, D. S.,  
593 Peacock, S. J., Smith, G. C. S., and Parkhill, J.: Recognizing the reagent microbiome, *Nature*  
594 *Microbiology*, 3, 851–853, <https://doi.org/10.1038/s41564-018-0202-y>, 2018.
- 595 Griffin, D. W., Gonzalez, C., Teigell, N., Petrosky, T., Northup, D. E., and Lyles, M.:  
596 Observations on the use of membrane filtration and liquid impingement to collect airborne  
597 microorganisms in various atmospheric environments, *Aerobiologia*, 27, 25–35,  
598 <https://doi.org/10.1007/s10453-010-9173-z>, 2011.
- 599 Gusareva, E. S., Acerbi, E., Lau, K. J. X., Luhung, I., Premkrishnan, B. N. V., Kolundžija, S.,  
600 Purbojati, R. W., Wong, A., Houghton, J. N. I., Miller, D., Gaultier, N. E., Heinle, C. E.,  
601 Clare, M. E., Vettath, V. K., Kee, C., Lim, S. B. Y., Chénard, C., Phung, W. J., Kushwaha, K.  
602 K., Nee, A. P., Putra, A., Panicker, D., Yanqing, K., Hwee, Y. Z., Lohar, S. R., Kuwata, M.,  
603 Kim, H. L., Yang, L., Uchida, A., Drautz-Moses, D. I., Junqueira, A. C. M., and Schuster, S.  
604 C.: Microbial communities in the tropical air ecosystem follow a precise diel cycle,  
605 *Proceedings of the National Academy of Sciences*, 116, 23299–23308,  
606 <https://doi.org/10.1073/pnas.1908493116>, 2019.
- 607 Hammer, Ø., Harper, D. A. T., and Ryan, P. D.: Past: Paleontological statistics software  
608 package for education and data analysis, *Palaeontologia Electronica*, 4, 1–9, 2001.
- 609 Jalasvuori, M.: Silent rain: does the atmosphere-mediated connectivity between microbiomes  
610 influence bacterial evolutionary rates?, *FEMS Microbiol Ecol*, 96,  
611 <https://doi.org/10.1093/femsec/fiaa096>, 2020.
- 612 Ji, B. W., Sheth, R. U., Dixit, P. D., Huang, Y., Kaufman, A., Wang, H. H., and Vitkup, D.:  
613 Quantifying spatiotemporal variability and noise in absolute microbiota abundances using  
614 replicate sampling, *Nat Methods*, 16, 731–736, <https://doi.org/10.1038/s41592-019-0467-y>,  
615 2019.

- 616 Joly, M., Amato, P., Sancelme, M., Vinatier, V., Abrantes, M., Deguillaume, L., and Delort,  
617 A.-M.: Survival of microbial isolates from clouds toward simulated atmospheric stress  
618 factors, *Atmospheric Environment*, 117, 92–98,  
619 <https://doi.org/10.1016/j.atmosenv.2015.07.009>, 2015.
- 620 Kathiriya, T., Gupta, A., and Singh, N. K.: An opinion review on sampling strategies,  
621 enumeration techniques, and critical environmental factors for bioaerosols: An emerging  
622 sustainability indicator for society and cities, <https://doi.org/10.1016/j.eti.2020.101287>, 2021.
- 623 Khaled, A., Zhang, M., Amato, P., Delort, A. M., and Ervens, B.: Biodegradation by bacteria  
624 in clouds: An underestimated sink for some organics in the atmospheric multiphase system,  
625 *Atmospheric Chemistry and Physics*, 21, 3123–3141, [https://doi.org/10.5194/acp-21-3123-](https://doi.org/10.5194/acp-21-3123-2021)  
626 2021, 2021.
- 627 Klein, A. M., Bohannon, B. J. M., Jaffe, D. A., Levin, D. A., and Green, J. L.: Molecular  
628 Evidence for Metabolically Active Bacteria in the Atmosphere, *Front. Microbiol.*, 772,  
629 <https://doi.org/10.3389/fmicb.2016.00772>, 2016.
- 630 Knüpfer, M., Braun, P., Baumann, K., Rehn, A., Antwerpen, M., Grass, G., and Wölfel, and  
631 R.: Evaluation of a Highly Efficient DNA Extraction Method for *Bacillus anthracis*  
632 Endospores, *Microorganisms*, 8, 763, <https://doi.org/10.3390/microorganisms8050763>, 2020.
- 633 Krumins, V., Mainelis, G., Kerkhof, L. J., and Fennell, D. E.: Substrate-Dependent rRNA  
634 Production in an Airborne Bacterium, *Environmental Science and Technology Letters*, 1,  
635 376–381, <https://doi.org/10.1021/ez500245y>, 2014.
- 636 Lallement, A., Besaury, L., Eyheraguibel, B., Amato, P., Sancelme, M., Mailhot, G., and  
637 Delort, A. M.: Draft Genome Sequence of *Rhodococcus enclensis* 23b-28, a Model Strain  
638 Isolated from Cloud Water, *Genome Announcements*, 5,  
639 <https://doi.org/10.1128/genomea.01199-17>, 2017.
- 640 Leyronas, C., Morris, C. E., Choufany, M., and Soubeyrand, S.: Assessing the Aerial  
641 Interconnectivity of Distant Reservoirs of *Sclerotinia sclerotiorum*, *Front. Microbiol.*, 9,  
642 <https://doi.org/10.3389/fmicb.2018.02257>, 2018.
- 643 Lynch, M. D. J. and Neufeld, J. D.: Ecology and exploration of the rare biosphere, *Nat Rev*  
644 *Microbiol*, 13, 217–229, <https://doi.org/10.1038/nrmicro3400>, 2015.
- 645 Manibusan, S. and Mainelis, G.: Passive bioaerosol samplers: A complementary tool for  
646 bioaerosol research. A review, *Journal of Aerosol Science*, 163, 105992,  
647 <https://doi.org/10.1016/j.jaerosci.2022.105992>, 2022.
- 648 Möhler, O., DeMott, P. J., Vali, G., and Levin, Z.: Microbiology and atmospheric processes:  
649 The role of biological particles in cloud physics, <https://doi.org/10.5194/bg-4-1059-2007>,  
650 2007.
- 651 Palarea-Albaladejo, J. and Martín-Fernández, J. A.: ZCompositions - R package for  
652 multivariate imputation of left-censored data under a compositional approach, *Chemometrics*  
653 *and Intelligent Laboratory Systems*, 143, 85–96,  
654 <https://doi.org/10.1016/j.chemolab.2015.02.019>, 2015.

- 655 Parada, A. E., Needham, D. M., and Fuhrman, J. A.: Every base matters: Assessing small  
656 subunit rRNA primers for marine microbiomes with mock communities, time series and  
657 global field samples, *Environmental Microbiology*, 18, 1403–1414,  
658 <https://doi.org/10.1111/1462-2920.13023>, 2016.
- 659 Pascoal, F., Costa, R., and Magalhães, C.: The microbial rare biosphere: current concepts,  
660 methods and ecological principles, *FEMS Microbiol Ecol*, 97, fiae227,  
661 <https://doi.org/10.1093/femsec/fiae227>, 2021.
- 662 Patade, S., Phillips, V. T. J., Amato, P., Bingemer, H. G., Burrows, S. M., DeMott, P. J.,  
663 Goncalves, F. L. T., Knopf, D. A., Morris, C. E., Alwmark, C., Artaxo, P., Pöhlker, C.,  
664 Schrod, J., and Weber, B.: Empirical formulation for multiple groups of primary biological  
665 ice nucleating particles from field observations over Amazonia, *Journal of the Atmospheric  
666 Sciences*, 1, <https://doi.org/10.1175/JAS-D-20-0096.1>, 2021.
- 667 Péguilhan, R., Besaury, L., Rossi, F., Enault, F., Baray, J., Deguillaume, L., and Amato, P.:  
668 Rainfalls sprinkle cloud bacterial diversity while scavenging biomass, *FEMS Microbiology  
669 Ecology*, 1–15, <https://doi.org/10.1093/femsec/fiab144>, 2021.
- 670 Péguilhan, R., Rossi, F., Rué, O., Joly, M., and Amato, P.: Comparative analysis of bacterial  
671 diversity in clouds and aerosols, *Atmospheric Environment*, 119635,  
672 <https://doi.org/10.1016/j.atmosenv.2023.119635>, 2023.
- 673 Pester, M., Bittner, N., Deevong, P., Wagner, M., and Loy, A.: A ‘rare biosphere’  
674 microorganism contributes to sulfate reduction in a peatland, *ISME J*, 4, 1591–1602,  
675 <https://doi.org/10.1038/ismej.2010.75>, 2010.
- 676 Prosser, J. I.: Replicate or lie, *Environmental Microbiology*, 12, 1806–1810,  
677 <https://doi.org/10.1111/j.1462-2920.2010.02201.x>, 2010.
- 678 Quast, C., Pruesse, E., Yilmaz, P., Gerken, J., Schweer, T., Yarza, P., Peplies, J., and  
679 Glöckner, F. O.: The SILVA ribosomal RNA gene database project: Improved data  
680 processing and web-based tools, *Nucleic Acids Research*, 41, 590–596,  
681 <https://doi.org/10.1093/nar/gks1219>, 2013.
- 682 R Core Team (2019). R: A language and environment for statistical computing.: [http://www.r-](http://www.r-project.org/index.html)  
683 [project.org/index.html](http://www.r-project.org/index.html), last access: 13 April 2020.
- 684 Raivo Kolde: pheatmap: Pretty Heatmaps. R package version 1.0.12., 2019.
- 685 Rossi, F., Péguilhan, R., Turgeon, N., Veillette, M., Baray, J.-L., Deguillaume, L., Amato, P.,  
686 and Duchaine, C.: Quantification of antibiotic resistance genes (ARGs) in clouds at a  
687 mountain site (puy de Dôme, central France), *Science of The Total Environment*, 161264,  
688 <https://doi.org/10.1016/j.scitotenv.2022.161264>, 2022.
- 689 Rule, A. M., Kesavan, J., Schwab, K. J., and Buckley, T. J.: Application of Flow Cytometry  
690 for the Assessment of Preservation and Recovery Efficiency of Bioaerosol Samplers Spiked  
691 with *Pantoea* agglomerans, *Environ. Sci. Technol.*, 41, 2467–2472,  
692 <https://doi.org/10.1021/es062394l>, 2007.
- 693 Salazar, G., Paoli, L., Alberti, A., Huerta-Cepas, J., Ruscheweyh, H.-J., Cuenca, M., Field, C.  
694 M., Coelho, L. P., Cruaud, C., Engelen, S., Gregory, A. C., Labadie, K., Marec, C., Pelletier,

- 695 E., Royo-Llonch, M., Roux, S., Sánchez, P., Uehara, H., Zayed, A. A., Zeller, G., Carmichael,  
696 M., Dimier, C., Ferland, J., Kandels, S., Picheral, M., Pisarev, S., Poulain, J., Acinas, S. G.,  
697 Babin, M., Bork, P., Boss, E., Bowler, C., Cochrane, G., de Vargas, C., Follows, M., Gorsky,  
698 G., Grimsley, N., Guidi, L., Hingamp, P., Iudicone, D., Jaillon, O., Kandels-Lewis, S., Karp-  
699 Boss, L., Karsenti, E., Not, F., Ogata, H., Pesant, S., Poulton, N., Raes, J., Sardet, C., Speich,  
700 S., Stemmann, L., Sullivan, M. B., Sunagawa, S., Wincker, P., Acinas, S. G., Babin, M.,  
701 Bork, P., Bowler, C., de Vargas, C., Guidi, L., Hingamp, P., Iudicone, D., Karp-Boss, L.,  
702 Karsenti, E., Ogata, H., Pesant, S., Speich, S., Sullivan, M. B., Wincker, P., and Sunagawa,  
703 S.: Gene Expression Changes and Community Turnover Differentially Shape the Global  
704 Ocean Metatranscriptome, *Cell*, 179, 1068-1083.e21,  
705 <https://doi.org/10.1016/j.cell.2019.10.014>, 2019.
- 706 Salter, S. J., Cox, M. J., Turek, E. M., Calus, S. T., Cookson, W. O., Moffatt, M. F., Turner,  
707 P., Parkhill, J., Loman, N. J., and Walker, A. W.: Reagent and laboratory contamination can  
708 critically impact sequence-based microbiome analyses, *BMC Biology*, 12, 87,  
709 <https://doi.org/10.1186/s12915-014-0087-z>, 2014.
- 710 Šantl-Temkiv, T., Amato, P., Gosewinkel, U., Thyraug, R., Charton, A., Chicot, B., Finster,  
711 K., Bratbak, G., and Löndahl, J.: High-Flow-Rate Impinger for the Study of Concentration,  
712 Viability, Metabolic Activity, and Ice-Nucleation Activity of Airborne Bacteria,  
713 *Environmental Science and Technology*, 51, 11224–11234,  
714 <https://doi.org/10.1021/acs.est.7b01480>, 2017.
- 715 Šantl-Temkiv, T., Sikoparija, B., Maki, T., Carotenuto, F., Amato, P., Yao, M., Morris, C. E.,  
716 Schnell, R., Jaenicke, R., Pöhlker, C., DeMott, P. J., Hill, T. C. J., and Huffman, J. A.:  
717 Bioaerosol field measurements: Challenges and perspectives in outdoor studies, *Aerosol*  
718 *Science and Technology*, 54, 520–546, <https://doi.org/10.1080/02786826.2019.1676395>,  
719 2020.
- 720 Šantl-Temkiv, T., Amato, P., Casamayor, E. O., Lee, P. K. H., and Pointing, S. B.: Microbial  
721 ecology of the atmosphere, *FEMS Microbiology Reviews*, fuac009,  
722 <https://doi.org/10.1093/femsre/fuac009>, 2022.
- 723 Shade, A., Jones, S. E., Caporaso, J. G., Handelsman, J., Knight, R., Fierer, N., and Gilbert, J.  
724 A.: Conditionally Rare Taxa Disproportionately Contribute to Temporal Changes in Microbial  
725 Diversity, *mBio*, 5, e01371-14, <https://doi.org/10.1128/mBio.01371-14>, 2014.
- 726 Smith, D. J., Timonen, H. J., Jaffe, D. A., Griffin, D. W., Birmele, M. N., Perry, K. D., Ward,  
727 P. D., and Roberts, M. S.: Intercontinental dispersal of bacteria and archaea by transpacific  
728 winds, *Applied and Environmental Microbiology*, 79, 1134–1139,  
729 <https://doi.org/10.1128/AEM.03029-12>, 2013.
- 730 Stinson, L. F., Keelan, J. A., and Payne, M. S.: Identification and removal of contaminating  
731 microbial DNA from PCR reagents: impact on low-biomass microbiome analyses, *Letters in*  
732 *Applied Microbiology*, 68, 2–8, <https://doi.org/10.1111/lam.13091>, 2019.
- 733 Tignat-perrier, R., Dommergue, A., Thollot, A., Keuschnig, C., Magand, O., Vogel, T. M.,  
734 and Larose, C.: Global airborne microbial communities controlled by surrounding landscapes  
735 and wind conditions, *Scientific Reports*, 1–11, <https://doi.org/10.1038/s41598-019-51073-4>,  
736 2019.

- 737 Tignat-Perrier, R., Dommergue, A., Thollot, A., Magand, O., Vogel, T. M., and Larose, C.:  
738 Microbial functional signature in the atmospheric boundary layer, *Biogeosciences*, 17, 6081–  
739 6095, <https://doi.org/10.5194/bg-17-6081-2020>, 2020a.
- 740 Tignat-Perrier, R., Dommergue, A., Thollot, A., Magand, O., Amato, P., Joly, M., Sellegri,  
741 K., Vogel, T. M., and Larose, C.: Seasonal shift in airborne microbial communities, *Science*  
742 *of The Total Environment*, 137129, <https://doi.org/10.1016/j.scitotenv.2020.137129>, 2020b.
- 743 Väitilingom, M., Attard, E., Gaiani, N., Sancelme, M., Deguillaume, L., Flossmann, A. I.,  
744 Amato, P., and Delort, A. M.: Long-term features of cloud microbiology at the puy de Dôme  
745 (France), *Atmospheric Environment*, 56, 88–100,  
746 <https://doi.org/10.1016/j.atmosenv.2012.03.072>, 2012.
- 747 Wirgot, N., Vinatier, V., Deguillaume, L., Sancelme, M., and Delort, A. M.: H<sub>2</sub>O<sub>2</sub> modulates  
748 the energetic metabolism of the cloud microbiome, *Atmospheric Chemistry and Physics*, 17,  
749 14841–14851, <https://doi.org/10.5194/acp-17-14841-2017>, 2017.
- 750 Womack, A. M., Artaxo, P. E., Ishida, F. Y., Mueller, R. C., Saleska, S. R., Wiedemann, K.  
751 T., Bohannan, B. J. M., and Green, J. L.: Characterization of active and total fungal  
752 communities in the atmosphere over the Amazon rainforest, *Biogeosciences*, 12, 6337–6349,  
753 <https://doi.org/10.5194/bg-12-6337-2015>, 2015.
- 754 Yoon, S. H., Ha, S. M., Kwon, S., Lim, J., Kim, Y., Seo, H., and Chun, J.: Introducing  
755 EzBioCloud: A taxonomically united database of 16S rRNA gene sequences and whole-  
756 genome assemblies, *International Journal of Systematic and Evolutionary Microbiology*, 67,  
757 1613–1617, <https://doi.org/10.1099/ijsem.0.001755>, 2017.
- 758 Zhang, M., Khaled, A., Amato, P., Delort, A. M., and Ervens, B.: Sensitivities to biological  
759 aerosol particle properties and ageing processes: Potential implications for aerosol-cloud  
760 interactions and optical properties, *Atmospheric Chemistry and Physics*, 21, 3699–3724,  
761 <https://doi.org/10.5194/acp-21-3699-2021>, 2021.
- 762 Zhao, J., Jin, L., Wu, D., Xie, J., Li, J., Fu, X., Cong, Z., Fu, P., Zhang, Y., Luo, X., Feng, X.,  
763 Zhang, G., Tiedje, J. M., and Li, X.: Global airborne bacterial community—interactions with  
764 Earth’s microbiomes and anthropogenic activities, *Proceedings of the National Academy of*  
765 *Sciences*, 119, e2204465119, <https://doi.org/10.1073/pnas.2204465119>, 2022.

766
